# Supplementary material for: Association of 24-hour Movement Behaviour with Loneliness and Happiness in Japanese Adults: A Compositional Data Analysis with Isotemporal Substitution Model
Source: Research Square preprint supplement (doi:10.21203/rs.3.rs-7322612/v1), 2025-09-22
Supplement: Supplementary file 1 [file ddb2971d74ab2f4073b1f292.docx]

**Questionnaires**

From a 2023 online survey conducted by MyVoice Com Inc.

The study protocol was approved by the Institutional Review Board of Waseda University (Approval No. 2022-407).

**Sociodemographic factors**

| Factor | Questions | Categories or values |
| --- | --- | --- |
| **Sex** | Please indicate your sex. | 1. Man 2. Woman |
| **Age** | Please indicate your age in numbers. |  |
| **Marital status** | Are you currently married? | 1. Unmarried (never married, divorced, or widowed) 2. Married |
| **Living arrangements** | How many people live in your household (including yourself)? | 1. Live alone 2. 2 people 3. 3 people 4. 4 people 5. 5 people 6. 6 people 7. 7 or more people |
| **Education level** | What is your highest level of education completed? | 1. Graduate school 2. University 3. Junior college / Technical college 4. Vocational school 5. High school (former middle school) 6. Junior high school (former elementary school) 7. Other |
| **Household annual income** | Please indicate your household’s annual income. | 1. Less than 3 million yen 2. 3 million – less than 5 million yen 3. 5 million – less than 7 million yen 4. 7 million – less than 10 million yen 5. 10 million – less than 15 million yen 6. 15 million yen or more |
| **Occupation type** | What is the main type of work you do (including full-time, part-time, and temporary/side jobs)?  Please select the one that occupies the largest proportion of your working time. | 1. Sedentary work / Desk work 2. Standing work 3. Work that involves walking around 4. Physical labour |

**Lifestyle factors**

| Factor | Questions | Categories |
| --- | --- | --- |
| **Smoking status** | Do you currently smoke tobacco? | 1. Yes, I smoke 2. No, I do not smoke |
| **Alcohol consumption** | Currently, on how many days per week do you usually drink alcohol (e.g., sake, shochu, beer, wine, spirits)? | 1. Every day 2. 5–6 days per week 3. 3–4 days per week 4. 1–2 days per week 5. 1–3 days per month 6. Quit drinking (abstained for 1 year or more) 7. Rarely or never drink (cannot drink) |

**Height and weight**

| Factor | Questions | Values |
| --- | --- | --- |
| **Height** | What is your current height (in centimetres)? Please enter to one decimal place. |  |
| **Weight** | What is your current weight (in kilograms)? Please enter to one decimal place. |  |

**24-hour movement behaviours**

| Questions | Values |
| --- | --- |
| During a typical week, how many hours and minutes per day do you usually spend on the following activities?  Please ensure that the total time adds up to 24 hours. | Sleep (not just lying in bed, but actually sleeping):  　＿ hours ＿ minutes  Sitting time (including lying down while awake):  　＿ hours ＿ minutes  Moderate-to-vigorous physical activity (MVPA)※1:  　＿ hours ＿ minutes  Light-intensity physical activity (other than the above)※2:  　＿ hours ＿ minutes |
| Notes:  ※1 Moderate-to-vigorous physical activity (MVPA): Activities that place a certain level of physical load, slightly increasing breathing or heart rate, or activities that substantially increase breathing and heart rate.  ※2 Light-intensity physical activity: Activities such as standing, walking slowly, or moving the body lightly. | |

**Loneliness (UCLA-3 Loneliness Scale)**

For each of the following items, please indicate how often you feel this way.
Choose the one option that best applies to you.

| Questions | Categories |
| --- | --- |
| 1. How often do you feel you lack companionship? | 1. Never or hardly ever 2. Sometimes 3. Often |
| 1. How often do you feel left out? | 1. Never or hardly ever 2. Sometimes 3. Often |
| 1. How often do you feel isolated from others? | 1. Never or hardly ever 2. Sometimes 3. Often |

**Happiness**

| Questions | Categories |
| --- | --- |
| How happy do you feel about yourself now? | 1. Happy 2. Somewhat happy 3. Somewhat unhappy 4. Unhappy |
