# Supplementary material for: Association of 24-hour Movement Behaviour with Loneliness and Happiness in Japanese Adults: A Compositional Data Analysis with Isotemporal Substitution Model
Source: Research Square preprint supplement (doi:10.21203/rs.3.rs-7322612/v1), 2025-09-22
Supplement: Supplementary file 2 [file e4202a0e1e70089f48a3e4ac.docx]

| Supplementary Table 1. Estimated influences on **loneliness** for time reallocations between 24-hour movement behaviours. | | | | | | | | |
| --- | --- | --- | --- | --- | --- | --- | --- | --- |
|  | To SB | | To Sleep | | To MVPA | | To LPA | |
| Behaviours changes (min/day) | OR | (95% CI) | OR | (95% CI) | OR | (95% CI) | OR | (95% CI) |
| From SB |  |  |  |  |  |  |  |  |
| 5 |  |  | 0.997 | (0.994 - 1.000) | 1.001 | (0.986 - 1.017) | 0.998 | (0.996 - 0.999) |
| 10 |  |  | 0.994 | (0.988 - 1.000) | 1.002 | (0.976 - 1.026) | 0.995 | (0.992 - 0.997) |
| 15 |  |  | 0.991 | (0.982 - 1.000) | 1.001 | (0.974 - 1.033) | 0.993 | (0.989 - 0.996) |
| 20 |  |  | 0.988 | (0.975 - 0.999) | 1.001 | (0.965 - 1.040) | 0.99 | (0.985 - 0.995) |
| 25 |  |  | 0.985 | (0.968 - 1.000) | 1.000 | (0.958 - 1.045) | 0.988 | (0.981 - 0.994) |
| 30 |  |  | 0.982 | (0.964 - 1.000) | 0.999 | (0.952 - 1.046) | 0.985 | (0.978 - 0.992) |
| From Sleep |  |  |  |  |  |  |  |  |
| 5 | 1.003 | (1.000 - 1.006) |  |  | 1.004 | (0.989 - 1.021) | 1.001 | (0.998 - 1.004) |
| 10 | 1.006 | (1.000 - 1.013) |  |  | 1.008 | (0.983 - 1.033) | 1.001 | (0.996 - 1.007) |
| 15 | 1.009 | (1.000 - 1.019) |  |  | 1.011 | (0.977 - 1.045) | 1.002 | (0.993 - 1.010) |
| 20 | 1.012 | (1.001 - 1.025) |  |  | 1.013 | (0.973 - 1.059) | 1.003 | (0.991 - 1.015) |
| 25 | 1.015 | (0.999 - 1.032) |  |  | 1.016 | (0.969 - 1.066) | 1.003 | (0.990 - 1.018) |
| 30 | 1.018 | (0.998 - 1.040) |  |  | 1.018 | (0.963 - 1.076) | 1.004 | (0.987 - 1.020) |
| From MVPA |  |  |  |  |  |  |  |  |
| 5 | 0.996 | (0.970 - 1.022) | 0.993 | (0.968 - 1.019) |  |  | 0.994 | (0.969 - 1.018) |
| From LPA |  |  |  |  |  |  |  |  |
| 5 | 1.002 | (1.001 - 1.004) | 0.999 | (0.997 - 1.002) | 1.004 | (0.991 - 1.018) |  |  |
| 10 | 1.005 | (1.002 - 1.007) | 0.999 | (0.993 - 1.004) | 1.007 | (0.982 - 1.030) |  |  |
| 15 | 1.007 | (1.004 - 1.011) | 0.998 | (0.990 - 1.006) | 1.009 | (0.980 - 1.040) |  |  |
| 20 | 1.01 | (1.005 - 1.015) | 0.998 | (0.986 - 1.008) | 1.011 | (0.970 - 1.049) |  |  |
| 25 | 1.012 | (1.005 - 1.018) | 0.997 | (0.982 - 1.011) | 1.013 | (0.971 - 1.060) |  |  |
| 30 | 1.014 | (1.007 - 1.022) | 0.997 | (0.980 - 1.013) | 1.014 | (0.968 - 1.061) |  |  |
| The isotemporalsotemTporal substitution model was adjusted for age, sex, education level, marital status, living arrangement, annual income, occupation type, BMI, smoking status, and alcohol consumption. | | | | | | | | |
| Abbreviations: OR: odds ratio; CI: confidence interval; SB: sedentary behaviours; MVPA: moderate-to-vigorous physical activity; LPA: light-intensity physical activity. | | | | | | | | |

| Supplementary Table 2. Estimated influences on **happiness** for time reallocations between 24-hour movement behaviours. | | | | | | | | |
| --- | --- | --- | --- | --- | --- | --- | --- | --- |
|  | To SB | | To Sleep | | To MVPA | | To LPA | |
| Behaviours changes (min/day) | OR | (95% CI) | OR | (95% CI) | OR | (95% CI) | OR | (95% CI) |
| From SB |  |  |  |  |  |  |  |  |
| 5 |  |  | 1.004 | (1.001 - 1.008) | 1.018 | (1.001 - 1.035) | 1.001 | (1.000 - 1.003) |
| 10 |  |  | 1.008 | (1.002 - 1.017) | 1.031 | (1.003 - 1.061) | 1.002 | (0.999 - 1.005) |
| 15 |  |  | 1.013 | (1.002 - 1.023) | 1.042 | (1.007 - 1.079) | 1.003 | (0.999 - 1.008) |
| 20 |  |  | 1.017 | (1.003 - 1.032) | 1.051 | (1.008 - 1.097) | 1.004 | (0.999 - 1.010) |
| 25 |  |  | 1.021 | (1.004 - 1.039) | 1.059 | (1.010 - 1.113) | 1.006 | (0.998 - 1.013) |
| 30 |  |  | 1.026 | (1.003 - 1.050) | 1.066 | (1.009 - 1.124) | 1.007 | (0.998 - 1.015) |
| From Sleep |  |  |  |  |  |  |  |  |
| 5 | 0.996 | (0.992 - 0.999) |  |  | 1.014 | (0.997 - 1.030) | 0.997 | (0.994 - 1.000) |
| 10 | 0.992 | (0.984 - 0.999) |  |  | 1.022 | (0.994 - 1.051) | 0.994 | (0.987 - 0.999) |
| 15 | 0.987 | (0.977 - 0.998) |  |  | 1.028 | (0.990 - 1.068) | 0.99 | (0.981 - 1.000) |
| 20 | 0.983 | (0.969 - 0.997) |  |  | 1.033 | (0.987 - 1.079) | 0.987 | (0.975 - 0.999) |
| 25 | 0.979 | (0.960 - 0.996) |  |  | 1.036 | (0.986 - 1.090) | 0.984 | (0.969 - 1.000) |
| 30 | 0.975 | (0.955 - 0.996) |  |  | 1.039 | (0.981 - 1.106) | 0.981 | (0.963 - 0.999) |
| From MVPA |  |  |  |  |  |  |  |  |
| 5 | 0.97 | (0.943 - 0.999) | 0.974 | (0.945 - 1.003) |  |  | 0.971 | (0.944 - 0.998) |
| From LPA |  |  |  |  |  |  |  |  |
| 5 | 0.999 | (0.998 - 1.000) | 1.003 | (1.000 - 1.006) | 1.017 | (1.001 - 1.034) |  |  |
| 10 | 0.998 | (0.995 - 1.001) | 1.006 | (1.000 - 1.012) | 1.029 | (1.003 - 1.056) |  |  |
| 15 | 0.997 | (0.993 - 1.001) | 1.009 | (1.000 - 1.020) | 1.038 | (1.004 - 1.076) |  |  |
| 20 | 0.996 | (0.990 - 1.002) | 1.013 | (1.001 - 1.025) | 1.046 | (0.999 - 1.092) |  |  |
| 25 | 0.995 | (0.988 - 1.002) | 1.016 | (1.001 - 1.031) | 1.053 | (1.005 - 1.109) |  |  |
| 30 | 0.994 | (0.986 - 1.002) | 1.019 | (1.001 - 1.038) | 1.06 | (1.005 - 1.115) |  |  |
| The isotemporalsotemTporal substitution model was adjusted for age, sex, education level, marital status, living arrangement, annual income, occupation type, BMI, smoking status, and alcohol consumption. | | | | | | | | |
| Abbreviations: OR: odds ratio; CI: confidence interval; SB: sedentary behaviours; MVPA: moderate-to-vigorous physical activity; LPA: light-intensity physical activity. | | | | | | | | |
